# Supplementary material for: A systematic review, meta-analysis and meta-regression of the effect of protein supplementation on resistance training-induced gains in muscle mass and strength in healthy adults
Source: PubMed Central journal article supplement — Br J Sports Med. 2017 Jul 11;52(6):376–84. doi: 10.1136/bjsports-2017-097608 (PMC5867436; doi:10.1136/bjsports-2017-097608), 2017-07-11
Supplement: bjsports-2017-097608supp001.pdf [file bjsports-2017-097608supp001.pdf]

## APPENDIX 1. Search strategy for CINAHL, EMBASE, Medline and SportDiscus.

**Database:** OVID Medline Epub Ahead of Print, In-Process & Other Non-Indexed Citations, Ovid MEDLINE(R) Daily and Ovid MEDLINE(R) <1946 to Present> (982 citations)

Search performed: January 2, 2017. Total citations: 3056

- 1 exp Dietary Proteins/
- 2 (protein\* adj3 (diet\* or supplement\* or intake\* or consum\*)).ti,ab,kf.
- 3 (protein\* adj3 ingest\*).ti,ab,kf.
- 4 or/1-3
- 5 Resistance Training/
- 6 Weight Lifting/
- 7 Isometric Contraction/
- 8 ((weight\* or isometric or strength or resistance) adj3 (train\* or lift\* or exercise\*)).ti,ab,kf.
- 9 exp muscle strength/
- 10 ((muscle\* or muscular) adj3 strength\*).ti,ab,kf.
- 11 or/5-10
- 12 4 and 11
- 13 animals/ not (humans/ and animals/)
- 14 12 not 13
- 15 limit 14 to english language
- 16 remove duplicates from 15

**Database:** Embase <1974 to 2016 December 30> (1161 citations)

Search performed: January 2, 2017

- 1 protein intake/
- 2 (protein\* adj3 (diet\* or supplement\* or intake\* or consum\* or ingest\*)).ti,ab,kw.
- 3 1 or 2
- 4 resistance training/
- 5 weight lifting/
- 6 ((weight or isometric or strength or resistance) adj3 (train\* or lift\* or exercise\*)).ti,ab,kw.
- 7 muscle strength/
- 8 ((muscle\* or muscular) adj3 strength\*).ti,ab,kw.
- 9 isometric contraction\*.ti,ab,kw.
- 10 or/4-9
- 11 3 and 10
- 12 exp animal/
- 13 human/
- 14 11 not (12 not (12 and 13))
- 15 remove duplicates from 14

16 limit 15 to english language

**Database:** CINAHL (406 citations)

Search performed: January 2, 2017

S15 S12 NOT S13 Limiters - English Language  
S14 S12 NOT S13  
S13 (MH "Animals+") NOT ((MH "Human") AND (MH "Animals+"))  
S12 S4 and S11  
S11 S5 OR S6 OR S7 OR S8 OR S9 OR S10  
S10 (muscle\* or muscular) N3 strength\*  
S9 (MH "Muscle Strength+")  
S8 (weight\* or isometric\* or strength\* or resistance) N3 (train\* or lift\* or exercise\*)  
  
S7 (MH "Weight Lifting")  
S6 (MH "Muscle Strengthening+")  
S5 (MH "Resistance Training")  
S4 S1 OR S2 OR S3  
S3 protein N3 (intake\* or inject\* or supplement\* or diet\* or consum)  
S2 (MH "Dietary Proteins+")  
S1 (MH "Diet, High Protein")

**Database:** SPORTDiscus (507 citations)

Search performed: January 2, 2017

S10 S4 AND S9 Limiters - Language: English  
S9 S5 OR S6 OR S7 OR S8  
S8 (muscle\* or muscular) N3 (strength\*)  
S7 DE "MUSCLE strength" OR DE "GRIP strength" OR DE "KRAUS-Weber test"  
S6 (weight\* or isometric\* or strength\* or resistance) N3 (train\* or lift\* or exercise\*)  
S5 DE "RESISTANCE training (Physical training & conditioning)" OR DE  
"ISOMETRIC exercise" OR DE "WEIGHT training"  
S4 S1 OR S2 OR S3  
S3 protein\* N3 (inject\* or diet\* or supplement\* or intake\* or consum\*)  
S2 DE "HIGH-protein diet" OR DE "FOOD -- Protein content"  
S1 DE "LOW protein diet"
