# Supplementary material for: A systematic review, meta-analysis and meta-regression of the effect of protein supplementation on resistance training-induced gains in muscle mass and strength in healthy adults
Source: PubMed Central journal article supplement — Br J Sports Med. 2017 Jul 11;52(6):376–84. doi: 10.1136/bjsports-2017-097608 (PMC5867436; doi:10.1136/bjsports-2017-097608), 2017-07-11
Supplement: bjsports-2017-097608supp002.pdf [file bjsports-2017-097608supp002.pdf]

Appendix 2. Risk of bias assessment.

|                      | Allocation concealment | Blinding of participants and personnel | Blinding of outcome assessment | Incomplete Outcome Data | Selective reporting | Other bias |
|----------------------|------------------------|----------------------------------------|--------------------------------|-------------------------|---------------------|------------|
| Andersen 2005 (16)   | L                      | L                                      | L                              | L                       | L                   | L          |
| Antonio 2014 (18)    | L                      | H                                      | H                              | L                       | L                   | H          |
| Antonio 2015 (17)    | H                      | H                                      | H                              | L                       | L                   | L          |
| Arazi 2011 (19)      | L                      | L                                      | L                              | L                       | L                   | L          |
| Arnarson 2013 (20)   | L                      | L                                      | L                              | L                       | L                   | L          |
| Babault 2014 (21)    | L                      | L                                      | L                              | L                       | L                   | L          |
| Babault 2015 (22)    | L                      | L                                      | L                              | L                       | L                   | L          |
| Bemben 2010 (23)     | L                      | L                                      | L                              | L                       | L                   | L          |
| Brown 2004 (24)      | L                      | L                                      | L                              | L                       | L                   | H          |
| Bunout 2004 (25)     | H                      | U                                      | H                              | L                       | U                   | L          |
| Burke 2001 (26)      | H                      | L                                      | L                              | H                       | L                   | H          |
| Campbell 1995 (27)   | H                      | L                                      | L                              | L                       | L                   | L          |
| Candow 2006 (28)     | H                      | L                                      | L                              | L                       | L                   | L          |
| Candow 2006a (29)    | L                      | L                                      | L                              | L                       | L                   | L          |
| Carter 2005 (30)     | L                      | L                                      | L                              | L                       | L                   | L          |
| Coburn 2006 (31)     | L                      | L                                      | L                              | L                       | L                   | L          |
| Cribb 2007 (32)      | L                      | L                                      | L                              | L                       | L                   | L          |
| Daly 2014 (33)       | L                      | H                                      | H                              | L                       | L                   | L          |
| Deibert 2011 (34)    | L                      | H                                      | H                              | L                       | L                   | L          |
| Eliot 2008 (35)      | L                      | L                                      | L                              | L                       | L                   | L          |
| Erksine 2012 (36)    | L                      | L                                      | H                              | L                       | L                   | L          |
| Farup 2014 (37)      | L                      | L                                      | L                              | L                       | L                   | L          |
| Hartman 2007 (38)    | L                      | L                                      | H                              | L                       | L                   | L          |
| Herda 2013 (39)      | L                      | L                                      | L                              | L                       | L                   | L          |
| Hoffman 2007 (40)    | L                      | L                                      | L                              | L                       | L                   | L          |
| Hoffman 2009 (41)    | L                      | H                                      | H                              | L                       | L                   | L          |
| Hulmi 2009 (42)      | L                      | L                                      | L                              | L                       | L                   | L          |
| Hulmi 2009a (44)     | L                      | L                                      | L                              | L                       | L                   | L          |
| Hulmi 2015 (43)      | L                      | L                                      | L                              | L                       | L                   | L          |
| Iglay 2009 (45)      | L                      | H                                      | H                              | L                       | L                   | L          |
| Josse 2010 (46)      | L                      | L                                      | H                              | L                       | L                   | L          |
| Kerksick 2006 (47)   | L                      | L                                      | L                              | L                       | L                   | L          |
| Leenders 2012 (48)   | L                      | L                                      | L                              | L                       | L                   | L          |
| Mielke 2009 (49)     | L                      | L                                      | L                              | L                       | L                   | L          |
| Mitchell 2015 (50)   | U                      | L                                      | H                              | L                       | L                   | H          |
| Negro 2014 (51)      | L                      | H                                      | H                              | L                       | L                   | L          |
| Oesen 2015 (52)      | L                      | H                                      | H                              | L                       | L                   | L          |
| Olsen 2006 (53)      | L                      | L                                      | L                              | L                       | L                   | L          |
| Paoli 2015 (55)      | L                      | H                                      | H                              | L                       | L                   | L          |
| Paoli 2015 (54)      | L                      | H                                      | H                              | L                       | L                   | L          |
| Rankin 2004 (56)     | L                      | U                                      | L                              | L                       | L                   | H          |
| Reidy 2016 (57)      | L                      | L                                      | L                              | L                       | L                   | L          |
| Rozenek 2002 (58)    | L                      | L                                      | L                              | L                       | L                   | L          |
| Snijders 2015 (59)   | L                      | L                                      | L                              | L                       | L                   | L          |
| Verdijk 2009 (60)    | L                      | L                                      | L                              | L                       | L                   | L          |
| Volek 2013 (61)      | L                      | L                                      | L                              | L                       | L                   | L          |
| Weisgarber 2012 (62) | L                      | L                                      | L                              | L                       | L                   | L          |
| White 2009 (63)      | L                      | H                                      | H                              | L                       | L                   | H          |
| Willoughby 2007 (64) | L                      | L                                      | L                              | L                       | L                   | L          |
