# Supplementary material for: A systematic review, meta-analysis and meta-regression of the effect of protein supplementation on resistance training-induced gains in muscle mass and strength in healthy adults
Source: PubMed Central journal article supplement — Br J Sports Med. 2017 Jul 11;52(6):376–84. doi: 10.1136/bjsports-2017-097608 (PMC5867436; doi:10.1136/bjsports-2017-097608), 2017-07-11
Supplement: bjsports-2017-097608supp003.pdf [file bjsports-2017-097608supp003.pdf]

**Supplementary Table 1. Participant characteristics, resistance exercise training details and individual study outcomes.**

| Author and Year                    | Subject Details |               | Resistance Exercise Training Details |             |                  |                    | Performance |     | Body Composition Outcomes |     |    |           |               |
|------------------------------------|-----------------|---------------|--------------------------------------|-------------|------------------|--------------------|-------------|-----|---------------------------|-----|----|-----------|---------------|
|                                    | Age             | Sex           | Training Status                      | Length (wk) | Frequency (d/wk) | Sets x Reps or %RM | 1RM         | MVC | Mass                      | FFM | FM | Fibre CSA | Mid-Femur CSA |
| Andersen 2005 (16)                 | 23              | M             | UT                                   | 14          | 3                | 3-4 x 4-15         |             | →   |                           |     |    | ↑         |               |
| Antonio 2014 (18)                  | 24              | M (29) F (11) | T                                    | 8           | ?                | ?                  |             |     | →                         | →   | →  |           |               |
| Antonio 2015 (17)                  | 24              | M (37) F (11) | T                                    | 8           | 5                | 3 x 5-15           | →           |     | ↓                         | →   | ↓  |           |               |
| Arazi 2011 (19)                    | 22              | M             | T                                    | 8           | 3                | 3 x 8              | ↑           |     | ↑                         |     |    |           |               |
| Arnason 2013 (20)                  | 74              | M (67) F (94) | UT                                   | 12          | 3                | 3 x 6-8            |             | →   |                           | →   |    |           |               |
| Babault 2015 (whey; 22)            | 22              | M             | UT                                   | 12          | 3                | 2-5 x 5-15         | →           | →   |                           |     |    |           |               |
| Babault 2015 (pea; 22)             | 22              | M             | UT                                   | 12          | 3                | 2-5 x 5-15         | →           | →   |                           |     |    |           |               |
| Babault 2014 (milk; 21)            | 22              | M             | UT                                   | 10          | 3                | 3-5 x 6-20         | →           |     | →                         |     |    |           |               |
| Babault 2014 (casein; 21)          | 22              | M             | UT                                   | 10          | 3                | 3-5 x 6-20         | →           |     | →                         |     |    |           |               |
| Bemben 2010 (23)                   | 57              | M             | UT                                   | 14          | 3                | 3 x 8              | →           |     |                           |     |    |           |               |
| Brown 2004 (whey; 24)              | 21              | M             | T                                    | 9           | ?                | 3 x 4-6            |             |     |                           | ↑   |    |           |               |
| Brown 2004 (soy; 24)               | 21              | M             | T                                    | 9           | ?                | 3 x 4-6            |             |     |                           | ↑   |    |           |               |
| Bunout 2004 (25)                   | 74              | M (14) F (33) | UT                                   | 52          | 2                | 3-10 x 10-15       |             | →   |                           | →   | →  |           |               |
| Burke 2001 (26)                    | ?               | M             | T                                    | 6           | 4                | 4-5 x 6-12         | →           | ↑   | ↑                         | ↑   | →  |           |               |
| Campbell 1995 (27)                 | 65              | M (8) F (4)   | UT                                   | 6           | 3                | 3 x 80%            |             |     | →                         | →   | →  | →         | →             |
| Candow 2006 (whey; 28)             | 24              | M (9) F (18)  | UT                                   | 6           | 4                | 4-5 x 6-12         | ↑           |     |                           | ↑   | →  |           |               |
| Candow 2006 (soy; 28)              | 23              | M (9) F (18)  | UT                                   | 6           | 4                | 4-5 x 6-12         | ↑           |     |                           | ↑   | →  |           |               |
| Candow 2006a (pre-ex; 29)          | 63              | M             | UT                                   | 12          | 3                | 3 x 10             | →           |     |                           | →   |    |           |               |
| Candow 2006a (post-ex; 29)         | 67              | M             | UT                                   | 12          | 3                | 3 x 10             | →           |     |                           | →   |    |           |               |
| Carter 2005 (30)                   | 57              | M             | UT                                   | 16          | 3                | 3 x 8              |             | →   |                           | →   |    |           | →             |
| Coburn 2006 (31)                   | 22              | M             | UT                                   | 8           | 3                | 3-5 x 80%          | ↑           |     | →                         | →   | →  |           | →             |
| Cribb 2007 (32)                    | 24              | M             | T                                    | 11          | ?                | ?                  | ↑           |     | →                         | →   | →  | ↑         |               |
| Daly 2014 (33)                     | 73              | F             | UT                                   | 16          | 2                | 3 x 8-12           | ↑           |     |                           | ↑   | →  |           | →             |
| Deibert 2011 (34)                  | 56              | M             | UT                                   | 12          | 2                | ? x 10-25          |             | ↑   | →                         | ↑   | →  |           |               |
| Eliot 2008 (35)                    | ?               | M             | ?                                    | 14          | 3                | 3 x 8              |             |     | →                         | →   | →  |           |               |
| Erksine 2012 (36)                  | 23              | M             | UT                                   | 12          | 3                | 2-3 x 8-10         | →           | →   |                           |     |    |           |               |
| Farup 2014 (37)                    | 24              | M             | UT                                   | 12          | 3                | 6-12 x 6-15        |             | →   |                           |     |    |           |               |
| Hartman 2007 (milk; 38)            | ?               | M             | UT                                   | 12          | 5                | 2-4 x 4-12         | →           |     | →                         | ↑   | ↓  | ↑         |               |
| Hartman 2007 (soy; 38)             | ?               | M             | UT                                   | 12          | 5                | 2-4 x 4-12         | →           |     | →                         | →   | →  | ↑         |               |
| Herda 2013 (39)                    | 21              | M             | UT                                   | 8           | 3                | 1-5 x 80%          | →           |     | →                         | →   |    |           | →             |
| Hoffman 2007 (40)                  | 21              | M             | T                                    | 12          | 4                | 2-5 x 3-10         | ↑           |     | →                         | →   |    |           |               |
| Hoffman 2009 (morning + night; 41) | 20              | M             | T                                    | 10          | 4                | 2-4 x 4-10         | →           |     | →                         | →   |    |           |               |
| Hoffman 2009 (pre- + post-ex; 41)  | 20              | M             | T                                    | 10          | 4                | 2-4 x 4-10         | →           |     | →                         | →   |    |           |               |
| Hulmi 2009 (42)                    | 26              | M             | UT                                   | 21          | 2                | 2-5 x 5-20         | →           | →   | →                         |     |    |           | ↑             |
| Hulmi 2009a (44)                   | 25              | M             | UT                                   | 21          | 2                | 2-5 x 5-20         |             |     | →                         |     |    | →         |               |
| Hulmi 2015 (PRO; 43)               | 34              | M             | UT                                   | 12          | 2 or 3           | 2-5 x 4-12         | →           | →   |                           | →   | ↓  |           | →             |
| Hulmi 2015 (PRO+CHO; 43)           | 34              | M             | UT                                   | 12          | 2 or 3           | 2-5 x 4-12         | →           | →   |                           | →   | ↓  |           | →             |
| Iglay 2009 (45)                    | 61              | M (17) F (19) | UT                                   | 12          | 3                | 2 x 8              |             |     |                           | →   | →  | →         |               |

Supplementary Table 1 Continued.

| Author and Year                   | Subject Details  |                 | Resistance Exercise Training Details |                  |                    | Performance |     | Body Composition Outcomes |         |         |           |               |
|-----------------------------------|------------------|-----------------|--------------------------------------|------------------|--------------------|-------------|-----|---------------------------|---------|---------|-----------|---------------|
|                                   | Age Sex          | Training Status | Length (wk)                          | Frequency (d/wk) | Sets x Reps or %RM | 1RM         | MVC | Mass                      | FFM     | FM      | Fibre CSA | Mid-Femur CSA |
| Josse 2010 (46)                   | 23 F             | UT              | 12                                   | 5                | 2-4 x 4-12         | →           |     | →                         | ↑       | ↓       |           |               |
| Kerksick 2006 (whey + casein; 47) | 31 M             | T               | 10                                   | 4                | 3 x 6-10           | →           |     | →                         | ↑       | →       |           |               |
| Kerksick 2006 (whey + EAA; 47)    | 31 M             | T               | 10                                   | 4                | 3 x 6-10           | →           |     | →                         | →       | →       |           |               |
| Leenders 2013 (men; 48)           | 70 M             | UT              | 24                                   | 3                | 2-4 x 8-15         | →           |     | →                         | →       |         | →         | →             |
| Leenders 2013 (women; 48)         | 72 F             | UT              | 24                                   | 3                | 2-4 x 8-15         | →           |     | →                         | →       |         | →         | →             |
| Mielke 2009 (49)                  | 23 M             | UT              | 8                                    | 3                | 1 or 2 x 6-8       | →           |     | →                         | →       | →       |           |               |
| Mitchell 2015 (young; 50)         | 22 M             | UT              | 12                                   | 3                | 3-4 x 75-85%       | →           | →   |                           |         |         | →         |               |
| Mitchell 2015 (old; 50)           | 74 M             | UT              | 12                                   | 3                | 3-4 x 75-85%       | →           | →   |                           |         |         | →         |               |
| Negro 2014 (51)                   | 24 M (19) F (7)  | UT              | 9                                    | 3                | 4 x 8              | →           |     |                           | ↑ (BIA) | ↓ (BIA) |           |               |
| Oesen 2015 (52)                   | 82 M (9) F (47)  | UT              | 24                                   | 2                | 1-2 x 15           |             | →   |                           |         |         |           |               |
| Olsen 2006 (53)                   | 24 M             | ?               | 16                                   | 3                | 3-5 x 6-12         |             | →   |                           |         |         | →         |               |
| Paoli 2015 (55)                   | 25 M             | UT              | 8                                    | 2 or 3           | 2-4 x 6-11         |             | →   |                           | →       | →       |           |               |
| Paoli 2016 (54)                   | 25 M             | UT              | 8                                    | 2 or 3           | 2-4 x 6-11         | →           |     |                           | →       | →       | →         |               |
| Rankin 2004 (56)                  | 21 M             | UT              | 10                                   | 3                | 3-5 x 3-12         | →           |     | →                         | →       | →       |           |               |
| Reidy 2016 (whey; 57)             | 25 M             | UT              | 12                                   | 3                | 3-4 x 8-10         | →           | →   | →                         | →       |         |           | →             |
| Reidy 2016 (soy; 57)              | 25 M             | UT              | 12                                   | 3                | 3-4 x 8-10         | →           | →   | →                         | →       |         |           | →             |
| Rozenek 2002 (58)                 | 23 M             | UT              | 8                                    | 4                | 4 x 8              | →           |     | →                         | →       | →       |           |               |
| Snijders 2015 (59)                | 22 M             | UT              | 12                                   | 3                | 2-4 x 8-15         | ↑           |     | →                         | →       |         | ↑         | ↑             |
| Verdijk 2009 (60)                 | 72 M             | UT              | 12                                   | 3                | 4 x 8-15           | →           |     | →                         | →       | →       | →         | →             |
| Volek 2013 (whey; 61)             | 23 M (37) F (26) | UT              | 36                                   | 2 or 3           | 3-5 x 3-15         | →           |     | →                         | ↑       | →       |           |               |
| Volek 2013 (soy; 61)              | 24 M (37) F (26) | UT              | 36                                   | 2 or 3           | 3-5 x 3-15         | →           |     | →                         | →       | →       |           |               |
| Weisgarber 2012 (62)              | 24 M (9) F (8)   | UT              | 8                                    | 4                | 3 x 6-10           | →           |     | →                         | →       | →       |           |               |
| White 2009 (yogurt; 63)           | 21 F             | UT              | 8                                    | 3                | ?                  | →           |     | →                         | →       | →       |           |               |
| White 2009 (whey; 63)             | 19 F             | UT              | 8                                    | 3                | ?                  | →           |     | →                         | →       | →       |           |               |
| Willoughby 2007 (64)              | 19 M             | UT              | 10                                   | 4                | 3 x 6-8            | ↑           |     | ↑                         | ↑       | →       |           |               |

**Note:** PRO = protein, CHO = carbohydrate, M = male, F = female, T = trained, UT = untrained, 1RM = one-repetition-maximum, MVC = maximum voluntary contraction, FFM = fat-free mass, FM = fat mass, CSA = cross sectional area, → no difference between groups, ↑ protein group increased more than the control group, and ↓ protein group decreased more than the control group.
