# Supplementary material for: A systematic review, meta-analysis and meta-regression of the effect of protein supplementation on resistance training-induced gains in muscle mass and strength in healthy adults
Source: PubMed Central journal article supplement — Br J Sports Med. 2017 Jul 11;52(6):376–84. doi: 10.1136/bjsports-2017-097608 (PMC5867436; doi:10.1136/bjsports-2017-097608), 2017-07-11
Supplement: bjsports-2017-097608supp004.pdf [file bjsports-2017-097608supp004.pdf]

Supplementary Table 2. Experimental and control condition details

| Author and Year                    | Supplement/Dietary Details                                    |                                                       |                                                                                                                      |    | Placebo/Control Details                             |    |
|------------------------------------|---------------------------------------------------------------|-------------------------------------------------------|----------------------------------------------------------------------------------------------------------------------|----|-----------------------------------------------------|----|
|                                    | Composition                                                   | Amount                                                | Timing                                                                                                               | N  | Amount                                              | N  |
| Andersen 2005 (16)                 | Protein blend (whey, casein, egg white protein and glutamine) | 25 g                                                  | Training days = pre- and post-exercise; non-training days = morning                                                  | 11 | 25 g CHO                                            | 11 |
| Antonio 2014 (18)                  | Instructed to consume high protein diet                       | 4.4 g/kg/day PRO diet                                 | N/A                                                                                                                  | 20 | 1.8 g/kg/day PRO diet                               | 10 |
| Antonio 2015 (17)                  | Instructed to consume high protein diet                       | 3.4 g/kg/day PRO diet                                 | N/A                                                                                                                  | 31 | No instruction - 2.3 g/kg/day PRO                   | 17 |
| Arazi 2011 (19)                    | Whey protein provided to increase dietary protein intake      | 1.8 g/kg/day was supplemented to increase PRO in diet | Training days = morning, post-exercise and night; non-training days = morning and night                              | 20 | CHO (unknown g)                                     | 20 |
| Arnason 2013 (20)                  | Whey protein beverage                                         | 20 g (+20 g CHO and 1 g fat)                          | Training days = post-exercise                                                                                        | 75 | 40 g CHO, 1 g fat                                   | 66 |
| Babault 2015 (whey; 22)            | Whey protein                                                  | 25 g                                                  | Training days = morning and post-exercise; non-training days = morning and afternoon                                 | 54 | 37.125 g CHO (74.25 g/d)                            | 54 |
| Babault 2015 (pea; 22)             | Pea protein                                                   | 25 g                                                  | Training days = morning and post-exercise; non-training days = morning and afternoon                                 | 53 | 37.125 g CHO (74.25 g/d)                            | 54 |
| Babault 2014 (milk; 21)            | Milk protein beverage                                         | 10 g (+20 g CHO)                                      | Training days = morning, pre- and post-exercise; non-training days = morning and night                               | 22 | 30 g CHO                                            | 24 |
| Babault 2014 (casein; 21)          | Casein protein beverage                                       | 10 g (+20 g CHO)                                      | Training days = morning, pre- and post-exercise; non-training days = morning and night                               | 22 | 30 g CHO                                            | 24 |
| Bemben 2010 (23)                   | Whey protein + Gatorade                                       | 35 g (+480 mL Gatorade)                               | Training days = post-exercise                                                                                        | 11 | 480 mL Gatorade                                     | 10 |
| Brown 2004 (whey; 24)              | Whey protein bar                                              | 11 g                                                  | Three times daily                                                                                                    | 9  | N/A                                                 | 9  |
| Brown 2004 (soy; 24)               | Soy protein bar                                               | 11 g                                                  | Three times daily                                                                                                    | 9  | N/A                                                 | 9  |
| Bunout 2004 (25)                   | Provided soup or porridge                                     | 6.5 g                                                 | Two times daily                                                                                                      | 31 | N/A                                                 | 28 |
| Burke 2001 (26)                    | Whey protein                                                  | additional 1.2 g/kg/day                               | Four times daily                                                                                                     | 12 | 1.2 g/kg/day CHO                                    | 11 |
| Campbell 1995 (27)                 | Milk beverage to increase dietary protein intake              | additional 1 g/kg/day                                 | ?                                                                                                                    | 6  | Milk with reduced additional PRO - 0.2 g/kg/day PRO | 6  |
| Candow 2006 (whey; 28)             | Whey protein                                                  | additional 1.2 g/kg/day                               | Training days = pre-exercise, post-exercise and pre-sleep; non-training days = three times spread throughout the day | 9  | 1.2 g/kg/day CHO                                    | 9  |
| Candow 2006 (soy; 28)              | Soy protein                                                   | additional 1.2 g/kg/day                               | Training days = pre-exercise, post-exercise and pre-sleep; non-training days = three times spread throughout the day | 9  | 1.2 g/kg/day CHO                                    | 9  |
| Candow 2006a (pre-ex; 29)          | Whey protein + Myoplex + Cocoa                                | additional 0.3 g/kg PRO                               | Training days = pre-exercise with a placebo post-exercise                                                            | 9  | 0.63 g/kg CHO                                       | 10 |
| Candow 2006a (post-ex; 29)         | Whey protein + Myoplex + Cocoa                                | additional 0.3 g/kg PRO                               | Training days = post-exercise with a placebo pre-exercise                                                            | 10 | 0.63 g/kg CHO                                       | 10 |
| Carter 2005 (30)                   | Whey protein + Gatorade                                       | 35 g (+480 mL Gatorade)                               | Training days = post-exercise                                                                                        | 11 | 480 mL Gatorade                                     | 10 |
| Coburn 2006 (31)                   | Whey and leucine beverage                                     | 20 g (+6.2 g leucine)                                 | Training days = morning, pre- and post-exercise; non-training days = morning                                         | 11 | 26.2 g CHO                                          | 12 |
| Cribb 2007 (32)                    | Whey protein                                                  | 1.29 g/kg/day                                         | Morning, post-exercise and pre-sleep                                                                                 | 5  | 1.325 g/kg/day CHO                                  | 7  |
| Daly 2014 (33)                     | Provided red meat                                             | 45 g/day                                              | Food was supplied and consumed it in two different meals                                                             | 48 | 25-35 g CHO                                         | 43 |
| Deibert 2011 (34)                  | Soy protein                                                   | 13.35 g (+7.65 g CHO)                                 | Post-exercise or evening                                                                                             | 15 | N/A                                                 | 15 |
| Eliot 2008 (35)                    | Whey protein                                                  | 35 g (+480 mL Gatorade)                               | Training days = post-exercise                                                                                        | 11 | 480 mL Gatorade                                     | 10 |
| Erksine 2012 (36)                  | Whey protein                                                  | 20 g (+6.7 g lactose)                                 | Training days = pre- and post-exercise                                                                               | 17 | 6.8 g lactose                                       | 16 |
| Farup 2014 (37)                    | Whey protein beverage                                         | 19.5 g (+19.5 g CHO)                                  | Training days = half pre- and half post-exercise                                                                     | 11 | 39 g CHO                                            | 11 |
| Hartman 2007 (milk; 38)            | Milk protein beverage                                         | 17.5 g (+25.7 g CHO and 0.4 g fat)                    | Training days = immediately and 1h post-exercise                                                                     | 18 | 9% CHO                                              | 19 |
| Hartman 2007 (soy; 38)             | Soy protein beverage                                          | 17.5 g (+25.7 g CHO and 0.4 g fat)                    | Training days = immediately and 1h post-exercise                                                                     | 19 | 9% CHO                                              | 19 |
| Herda 2013 (39)                    | Whey protein                                                  | 20 g                                                  | Training days = pre- and post-exercise; non-training days = once with no specific time                               | 22 | 27 g CHO                                            | 21 |
| Hoffman 2007 (40)                  | Protein blend (glutamine, whey, egg and milk protein)         | 42 g (+18 g CHO and 3 g fat)                          | Training days = morning and post-exercise; non-training days = morning                                               | 11 | 63 g CHO, 2 g PRO and 2 g fat                       | 10 |
| Hoffman 2009 (morning + night; 41) | Protein blend (collagen, whey and casein)                     | 42 g (+2 g CHO)                                       | Morning and evening daily                                                                                            | 13 | N/A                                                 | 7  |
| Hoffman 2009 (pre- + post-ex; 41)  | Protein blend (collagen, whey and casein)                     | 42 g (+2 g CHO)                                       | Training days = pre- and post-exercise; non-training days = taken at similar two similar times                       | 13 | N/A                                                 | 7  |
| Hulmi 2009 (42)                    | Whey protein                                                  | 15 g                                                  | Training days = pre- and post-exercise                                                                               | 11 | Nonenergetic placebo drink                          | 10 |
| Hulmi 2009a (44)                   | Whey protein                                                  | 15 g                                                  | Training days = pre- and post-exercise                                                                               | 9  | Nonenergetic placebo drink                          | 9  |
| Hulmi 2015 (PRO; 43)               | Whey protein                                                  | 30 g (+5 g lactose)                                   | Training days = post-exercise                                                                                        | 22 | 34.5 g CHO                                          | 21 |
| Hulmi 2015 (PRO+CHO; 43)           | Whey protein beverage                                         | 30 g (+34.5 g CHO)                                    | Training days = post-exercise                                                                                        | 25 | 34.5 g CHO                                          | 21 |
| Iglay 2009 (45)                    | Instructed to consume high protein diet                       | 1.6 g/kg/day PRO diet                                 | N/A                                                                                                                  | 18 | 0.8 g/kg/day PRO                                    | 18 |

Supplementary Table 2 Continued.

| Author and Year                   | Supplement/Dietary Details                               |                                                                            |                                                                                        |    | Placebo/Control Details                 |    |
|-----------------------------------|----------------------------------------------------------|----------------------------------------------------------------------------|----------------------------------------------------------------------------------------|----|-----------------------------------------|----|
|                                   | Composition                                              | Amount                                                                     | Timing                                                                                 | N  | Amount                                  | N  |
| Josse 2010 (46)                   | Fat-free milk                                            | 18 g (+24 g CHO)                                                           | Training days = immediately and 1h post-exercise                                       | 10 | CHO (unknown g)                         | 10 |
| Kerksick 2006 (whey + casein; 47) | Whey and casein beverage                                 | 40 g (+8 g casein)                                                         | Training days = post-workout; non-training days = morning                              | 10 | 48 g CHO                                | 11 |
| Kerksick 2006 (whey + EAA; 47)    | Whey and AA beverage                                     | 40 g (+3 g BCAA and 5 g glutamine)                                         | Training days = post-workout; non-training days = morning                              | 15 | 48 g CHO                                | 11 |
| Leenders 2013 (men; 48)           | Milk                                                     | 15 g (+0.5 g fat, 7.13 g lactose and 0.42 g calcium)                       | Morning daily                                                                          | 15 | 7.13 g lactose, 0.42g calcium           | 14 |
| Leenders 2013 (women; 48)         | Milk                                                     | 15 g (+0.5 g fat, 7.13 g lactose and 0.42 g calcium)                       | Morning daily                                                                          | 12 | 7.13 g lactose, 0.42g calcium           | 12 |
| Mielke 2009 (49)                  | Whey and leucine beverage                                | 20 g (+6.2 g leucine)                                                      | Training days = pre- and post-exercise; non-training days = morning and night          | 13 | 20 g CHO                                | 13 |
| Mitchell 2015 (young; 50)         | 500ml chocolate milk                                     | 14 g (+54 g CHO and 5 g fat)                                               | Training days = post-exercise; non-training days = taken after breakfast               | ?  | 0.4 g PRO, 5 g fat and 66 g CHO         | ?  |
| Mitchell 2015 (old; 50)           | 500ml chocolate milk                                     | 14 g (+54 g CHO and 5 g fat)                                               | Training days = post-exercise; non-training days = taken after breakfast               | ?  | 0.4 g PRO, 5 g fat and 66 g CHO         | ?  |
| Negro 2014 (51)                   | Daily 135 g serving of lean beef                         | 20 g (+1.7 g fat)                                                          | Training days = post-exercise                                                          | 12 | N/A                                     | 14 |
| Oesen 2015 (52)                   | Protein beverage                                         | 20.7 g (+9.3 g CHO, 3 g fat, 800 IU Vit D, 2.9 mg Vit B6 and 3 ug Vit B12) | Training days = morning and post-exercise; non-training days = morning                 | 25 | N/A                                     | 31 |
| Olsen 2006 (53)                   | Milk                                                     | 20 g (+80 g CHO)                                                           | Training days = half pre-exercise and half post-exercise                               | 8  | 80 g CHO                                | 8  |
| Paoli 2015 (55)                   | Provided whey protein to increase dietary protein intake | 1.8 g/kg/day PRO diet                                                      | Training days = pre- and post-exercise                                                 | 9  | 0.85 g/kg/day CHO                       | 9  |
| Paoli 2016 (54)                   | Provided whey protein to increase dietary protein intake | 1.8 g/kg/day PRO diet                                                      | Training days = pre- and post-exercise                                                 | 9  | 0.85 g/kg/day CHO                       | 9  |
| Rankin 2004 (56)                  | Low fat chocolate milk                                   | 0.21 g/kg (+0.92 g/kg CHO and 0.06 g/kg fat)                               | Training days = post-exercise                                                          | 10 | 1.25 g/kg CHO                           | 9  |
| Reidy 2016 (whey; 57)             | Whey protein                                             | 22 g                                                                       | Training days = post-exercise; non-training days = between meals                       | 23 | 22 g CHO                                | 23 |
| Reidy 2016 (soy; 57)              | Soy protein                                              | 22 g                                                                       | Training days = post-exercise; non-training days = between meals                       | 22 | 22 g CHO                                | 23 |
| Rozenek 2002 (58)                 | Protein beverage                                         | 106 g (+356 g CHO and 18 g fat)                                            | Daily with half consumed between the morning and afternoon and half consumed pre-sleep | 26 | 450 g CHO, 24 g PRO, 14 g fat           | 25 |
| Snijders 2015 (59)                | Casein protein                                           | 27.5 g (+15 g CHO)                                                         | Daily pre-sleep                                                                        | 20 | Nonenergetic placebo drink              | 19 |
| Verdijk 2009 (60)                 | Casein protein                                           | 10 g                                                                       | Training days = pre- and post-exercise                                                 | 13 | citric acid and CHO (unknown g)         | 13 |
| Volek 2013 (whey; 61)             | Whey protein                                             | 21.6 g (+22.5 g CHO and 1.9 g fat)                                         | Training days = post-exercise; non-training days = morning                             | 19 | 45.2 g CHO                              | 22 |
| Volek 2013 (soy; 61)              | Soy protein                                              | 20 g (+24.5 g CHO and 1.3 g fat)                                           | Training days = post-exercise; non-training days = morning                             | 22 | 45.2 g CHO                              | 22 |
| Weisgarber 2012 (62)              | Whey protein                                             | 0.3 g/kg body mass                                                         | Training days = half pre-exercise and the rest throughout the training session         | 9  | 0.2 g/kg comstarch and 0.1 g/kg sucrose | 8  |
| White 2009 (yogurt; 63)           | Yogurt                                                   | 5 g (+19 g CHO, 200 mg calcium and 80 IU Vit D)                            | Three yogurts per day                                                                  | 12 | 25 g CHO                                | 11 |
| White 2009 (whey; 63)             | Whey protein                                             | 5 g (+20 g CHO)                                                            | Training days = post-exercise                                                          | 12 | 25 g CHO                                | 11 |
| Willoughby 2007 (64)              | Protein blend (whey, milk, casein and AAs)               | 40 g                                                                       | Training days = pre- and post-exercise; non-training days = morning                    | 10 | 40 g CHO                                | 9  |

**Note:** EAA = essential amino acids, Vit = vitamin, CHO = carbohydrate, and PRO = protein.
