# Supplementary material for: A systematic review, meta-analysis and meta-regression of the effect of protein supplementation on resistance training-induced gains in muscle mass and strength in healthy adults
Source: PubMed Central journal article supplement — Br J Sports Med. 2017 Jul 11;52(6):376–84. doi: 10.1136/bjsports-2017-097608 (PMC5867436; doi:10.1136/bjsports-2017-097608), 2017-07-11
Supplement: bjsports-2017-097608supp008.pdf [file bjsports-2017-097608supp008.pdf]

**Supplementary Table 3. Additional univariate meta-regressions.**

| Univariate                            | 1RM |                      |                     |                |         | Fat Free Mass |                     |                     |                |         |
|---------------------------------------|-----|----------------------|---------------------|----------------|---------|---------------|---------------------|---------------------|----------------|---------|
|                                       | N   | Coeff. (95% CI)      | Adj. R <sup>2</sup> | I <sup>2</sup> | p-value | N             | Coeff. (95% CI)     | Adj. R <sup>2</sup> | I <sup>2</sup> | p-value |
| Mean Diff - Total PRO intake (g/kg/d) | 16  | 2.54 (-8.01, 13.07)  | -2%                 | 55%            | 0.61    | 18            | -0.01 (-1.14, 1.13) | -20%                | 17%            | 0.99    |
| Mean Diff - $\Delta$ PRO intake (g/d) | 13  | -0.03 (-0.13, 0.08)  | 0%                  | 0%             | 0.60    | 14            | -0.01 (-0.02, 0.01) | 0%                  | 0%             | 0.70    |
| Repetitions per set                   | 28  | -0.14 (-1.25, 0.98)  | -9%                 | 34%            | 0.80    | 26            | 0.02 (-0.07, 0.10)  | -6%                 | 0%             | 0.74    |
| Sets per exercise                     | 28  | 1.97 (-0.62, 4.57)   | 31%                 | 16%            | 0.13    | 25            | -0.01 (-0.51, 0.48) | -18%                | 0%             | 0.96    |
| Exercises per session                 | 25  | 0.33 (-0.21, 0.87)   | 15%                 | 29%            | 0.23    | 23            | 0.02 (-0.06, 0.09)  | -29%                | 2%             | 0.17    |
| Frequency (sessions per week)         | 27  | 2.54 (-0.95, 6.03)   | 22%                 | 28%            | 0.15    | 26            | 0.12 (-0.17, 0.41)  | 7%                  | 0%             | 0.39    |
| Length (number of weeks)              | 29  | -0.21 (-0.51, 0.08)  | 9%                  | 47%            | 0.15    | 27            | -0.02 (-0.05, 0.01) | 10%                 | 2%             | 0.24    |
| Total Volume                          | 24  | -0.00 (-0.00, 0.00)  | -14%                | 45%            | 0.69    | 23            | -0.00 (-0.00, 0.00) | -15%                | 3%             | -0.90   |
| Source (whey or soy)                  | 17  | -1.95 (-10.98, 7.08) | -12%                | 59%            | 0.65    | 14            | -0.12 (-0.95, 0.71) | -36%                | 31%            | 0.85    |
| Sex (male or female)                  | 24  | -0.27 (-7.61, 7.06)  | -6%                 | 36%            | 0.94    | 21            | -0.04 (-0.72, 0.63) | -23%                | 15%            | 0.90    |
| Type (diet or exercise-supplement)    | 28  | -2.12(-5.75, 1.52)   | 20%                 | 21%            | 0.24    | 27            | 0.05 (-0.42, 0.52)  | -21%                | 10%            | 0.83    |
| Whole-body (yes or no)                | 27  | 4.41 (1.14, 7.68)    | 76%                 | 2%             | 0.01    | 25            | -0.22 (-1.15, 0.71) | -2%                 | 1%             | 0.63    |
| Supervision (yes or no)               | 28  | -3.80 (-7.56, -0.06) | 58%                 | 5%             | 0.05    | 27            | 0.48 (-0.28, 1.24)  | 21%                 | 0%             | 0.21    |

**Note:** Diff = difference, PRO = protein, and 1RM = one-repetition-maximum
